# Supplementary material for: Identification of key genes in non-small cell lung cancer by bioinformatics analysis
Source: PeerJ journal article supplement (doi:10.7717/peerj.8215), 2019-12-12

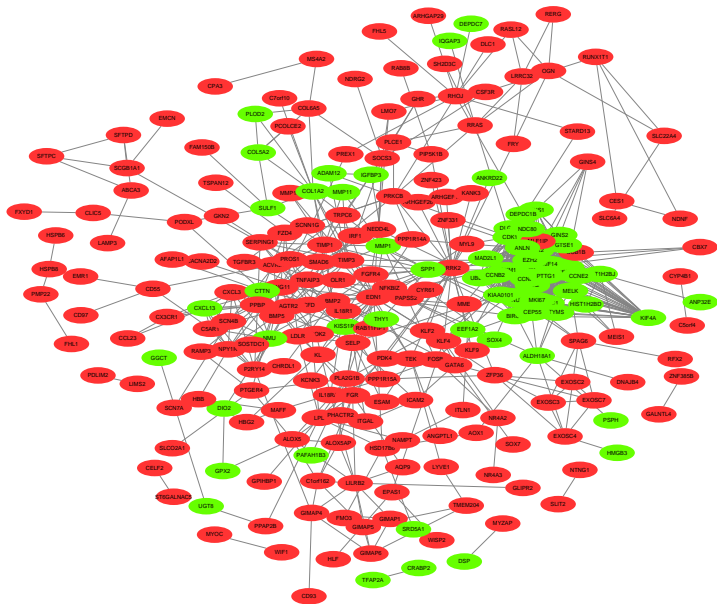

Supplement: Supplementary_Figure_1.pdf [file Supplementary_Figure_1.pdf]
